# Supplementary material for: Maintenance therapy for early loss of B-cell aplasia after anti-CD19 CAR T-cell therapy
Source: PubMed Central journal article supplement — Blood Adv. 2023 Oct 13;8(8):1959–63. doi: 10.1182/bloodadvances.2023011168 (PMC11021820; doi:10.1182/bloodadvances.2023011168), 2023-10-13
Supplement: BLOODA_ADV-2023-011168-mmc1.pdf [file BLOODA_ADV-2023-011168-mmc1.pdf]

|                                                       | n=19<br>WHOLE TREATED COHORT |             | n=11<br>ALLO-SCT |             | n=8<br>MAINTENANCE |             | P      | n=6<br>NO UPFRONT TREATMENT |             | p      |
|-------------------------------------------------------|------------------------------|-------------|------------------|-------------|--------------------|-------------|--------|-----------------------------|-------------|--------|
| Variable                                              | n<br>or median               | %<br>or IQR | n<br>or median   | %<br>or IQR | n<br>or median     | %<br>or IQR |        | n<br>or median              | %<br>or IQR |        |
| Male                                                  | 6                            | 31.60%      | 3                | 27.30%      | 3                  | 37.5%       | 1      | 3                           | 50.0%       | 0.7693 |
| Age at CAR T-cell infusion                            | 7.9 years                    | 6.1-12.6    | 7.9              | 6.3-12.8    | 8.75               | 4.9-12.2    | 0.8043 | 13.4                        | 9.8-19.7    | 0.1974 |
| <b>Characteristics of initial diagnosis</b>           |                              |             |                  |             |                    |             |        |                             |             |        |
| Infant ALL (n of pts)                                 | 3                            | 15.80%      | 1                | 9.10%       | 2                  | 25%         | 0.5459 | 0                           | 0.0%        | 0.4357 |
| Median WCC (x 10 <sup>9</sup> /L)                     | 10                           | 9.4-99.8    | 10               | 9.9-44      | 40                 | 8.5-128.5   | 0.8729 | 36.5                        | 19.1-51.8   | 0.9297 |
| <b>NCI risk</b>                                       |                              |             |                  |             |                    |             |        |                             |             |        |
| High                                                  | 7                            | 36.80%      | 2                | 27.30%      | 4                  | 50%         | 0.37   | 1                           | 16.7%       | 0.8212 |
| Standard                                              | 9                            | 47.40%      | 7                | 54.50%      | 3                  | 37.50%      |        | 3                           | 50.0%       |        |
| Not known                                             | 3                            | 15.80%      | 2                | 18.20%      | 1                  | 12.50%      |        | 2                           | 33.3%       |        |
| <b>Cytogenetic risk</b>                               |                              |             |                  |             |                    |             |        |                             |             |        |
| Good risk                                             | 9                            | 47.40%      | 5                | 45.50%      | 4                  | 50%         | 1      | 1                           | 16.7%       | 0.1978 |
| <i>ETV6-RUNX1</i>                                     | 3                            | 15.80%      | 2                | 18.20%      | 1                  | 12.50%      |        | 1                           | 16.7%       |        |
| High hyperdiploid                                     | 6                            | 31.60%      | 3                | 27.30%      | 3                  | 37.50%      |        |                             |             |        |
| Intermediate risk                                     | 1                            | 5.30%       | 1                | 9.10%       | 0                  |             |        |                             |             |        |
| IKZF1 deletion                                        | 1                            | 5.30%       | 1                | 9.10%       | 0                  |             |        |                             |             |        |
| High risk                                             | 5                            | 26.30%      | 3                | 27.30%      | 2                  | 25%         |        | 0                           | 0%          |        |
| <i>KMT2Ar</i>                                         | 3                            | 15.80%      | 1                | 9.10%       | 2                  | 25%         |        |                             |             |        |
| <i>BCR-ABL</i>                                        | 1                            | 5.30%       | 1                | 9.10%       | 0                  |             |        |                             |             |        |
| t(17;19)/ <i>TCF3-HLF</i>                             | 1                            | 5.30%       | 1                | 9.10%       | 0                  |             |        |                             |             |        |
| Uninformative cytogenetics                            | 4                            | 21.10%      | 2                | 18.20%      | 2                  | 25%         |        | 5                           | 83.3%       |        |
| Unknown                                               | 1                            | 5.30%       | 1                | 9.10%       | 0                  |             |        | 1                           | 16.7%       |        |
| Other                                                 | 3                            | 15.80%      | 1                | 9.10%       | 2                  | 25%         |        | 4                           | 66.7%       |        |
| <b>Characteristics of relapsed/refractory disease</b> |                              |             |                  |             |                    |             |        |                             |             |        |

|                                                                |                         |                                  |                           |                                      |                           |                                      |        |                         |                                |               |
|----------------------------------------------------------------|-------------------------|----------------------------------|---------------------------|--------------------------------------|---------------------------|--------------------------------------|--------|-------------------------|--------------------------------|---------------|
| <b>Indication for CAR T</b>                                    |                         |                                  |                           |                                      |                           |                                      |        |                         |                                |               |
| Primary refractory                                             | 1                       | 5.30%                            | 1                         | 9.10%                                | 0                         |                                      | 1      | 0                       | 0.0%                           | 1             |
| Relapse                                                        | 18                      | 94.70%                           | 10                        | 90.90%                               | 8                         | 100%                                 |        | 6                       | 100.0%                         |               |
| <b>Refractory status</b>                                       |                         |                                  |                           |                                      |                           |                                      |        |                         |                                |               |
| At any time point                                              | 11                      | 57.90%                           | 7                         | 63.60%                               | 4                         | 50%                                  | 0.6577 | 1                       | 16.7%                          | 0.2399        |
| <b>Median number of relapses</b>                               | 1                       | 1.0-2.0                          | 1                         | 1.0-1.5                              | 1.5                       | 1.0-2.0                              | 0.2754 | 2                       | 2.0-2.8                        | <b>0.0359</b> |
| <b>CNS and extramedullary disease</b>                          |                         |                                  |                           |                                      |                           |                                      |        |                         |                                |               |
| CNS at any point                                               | 11                      | 57.90%                           | 5                         | 45.50%                               | 6                         | 75%                                  | 0.3521 | 2                       | 33.3%                          | 0.3426        |
| EM non-CNS relapses (both isolated and combined)               | 2                       | 10.50%                           | 1                         | 9.10%                                | 1                         | 12.50%                               | 1      | 2                       | 50.0%                          | 0.5235        |
| <b>Median number of previous therapy lines (excluding SCT)</b> | 2                       | 2.0-2.0                          | 2                         | 2.0-2.0                              | 2                         | 2.0-2.2                              | 0.7737 | 2                       | 2.0-2.75                       | 0.5282        |
| Prior SCT                                                      | 5                       | 26.30%                           | 2                         | 18.20%                               | 3                         | 37.50%                               | 0.6027 | 3                       | 50.0%                          | 0.4199        |
| Blinatumomab exposure                                          | 4                       | 21.10%                           | 1                         | 9.10%                                | 3                         | 37.50%                               | 0.2621 | 1                       | 16.7%                          | 0.3789        |
| Inotuzumab exposure                                            | 1                       | 5.30%                            | 0                         |                                      | 1                         | 12.50%                               | 0.4211 | 2                       | 33.3%                          | 0.08522       |
| <b>CAR T-cell therapy</b>                                      |                         |                                  |                           |                                      |                           |                                      |        |                         |                                |               |
| <b>Status pre-lymphodepletion</b>                              |                         |                                  |                           |                                      |                           |                                      |        |                         |                                |               |
| High disease burden (>=5%)                                     | 3                       | 15.80%                           | 2                         | 18.20%                               | 1                         | 12.50%                               | 1      | 4                       | 66.7%                          | 0.09322       |
| Low disease burden (<5%)                                       | 11                      | 57.90%                           | 6                         | 54.60%                               | 5                         | 62.50%                               |        | 0                       |                                |               |
| Undetectable by MRD                                            | 5                       | 26.30%                           | 3                         | 27.30%                               | 2                         | 25%                                  |        | 2                       | 50.0%                          |               |
| <b>CAR T-cell product</b>                                      |                         |                                  |                           |                                      |                           |                                      |        |                         |                                |               |
| Tisagenlecleucel                                               | 17                      | 89.50%                           | 10                        | 90.90%                               | 7                         | 87.50%                               | 1      | 4                       | 66.7%                          | 0.5235        |
| Experimental                                                   | 2                       | 10.50%                           | 1                         | 9.10%                                | 1                         | 12.50%                               |        | 2                       | 33.3%                          |               |
| <b>Median CAR T-cell dose/kg (n=17)</b>                        | 2.7x10 <sup>6</sup> /kg | 1.8-3.7<br>7x10 <sup>6</sup> /kg | 3.4 7x10 <sup>6</sup> /kg | 2.5-4.3<br>7x10 <sup>6</sup> /kg     | 2.4 7x10 <sup>6</sup> /kg | 1.5-<br>2.87x10 <sup>6</sup> /<br>kg | 0.2069 | 2 7x10 <sup>6</sup> /kg | 1.6-2.95 7x10 <sup>6</sup> /kg | 0.4019        |
| <b>Time to LBCA</b>                                            |                         |                                  |                           |                                      |                           |                                      |        |                         |                                |               |
| Median (months)                                                | 2.66 months             | 95% CI: 2.3-<br>3.6              | 2.66                      | 95% CI:<br>2.07 to<br>not<br>reachde | 2.64                      | 95% CI:<br>2.3 to not<br>reached     | 0.9    | 2.59                    | 95% CI: 1.61 to not<br>reached | 1             |

|            |    |        |   |        |   |     |   |   |       |   |
|------------|----|--------|---|--------|---|-----|---|---|-------|---|
| 0-3 months | 13 | 68.4%  | 7 | 63.60% | 6 | 75% | 1 | 4 | 66.7% | 1 |
| 3-6 months | 6  | 31.60% | 4 | 34.4%  | 2 | 25% |   | 2 | 50.0% |   |

Supplementary Table

Including patients (n = 6 who did not receive treatment for early LBCA).

Categorical variables are compared with Fisher exact test, continuous variables with Kruskal-Wallis test.
